# Supplementary material
Source: PubMed Central journal article supplement (PMC2859998)
Supplement: NIHMS192741-supplement-01.pdf [file NIHMS192741-supplement-01.pdf]

Supplemental Figure for Reviewers

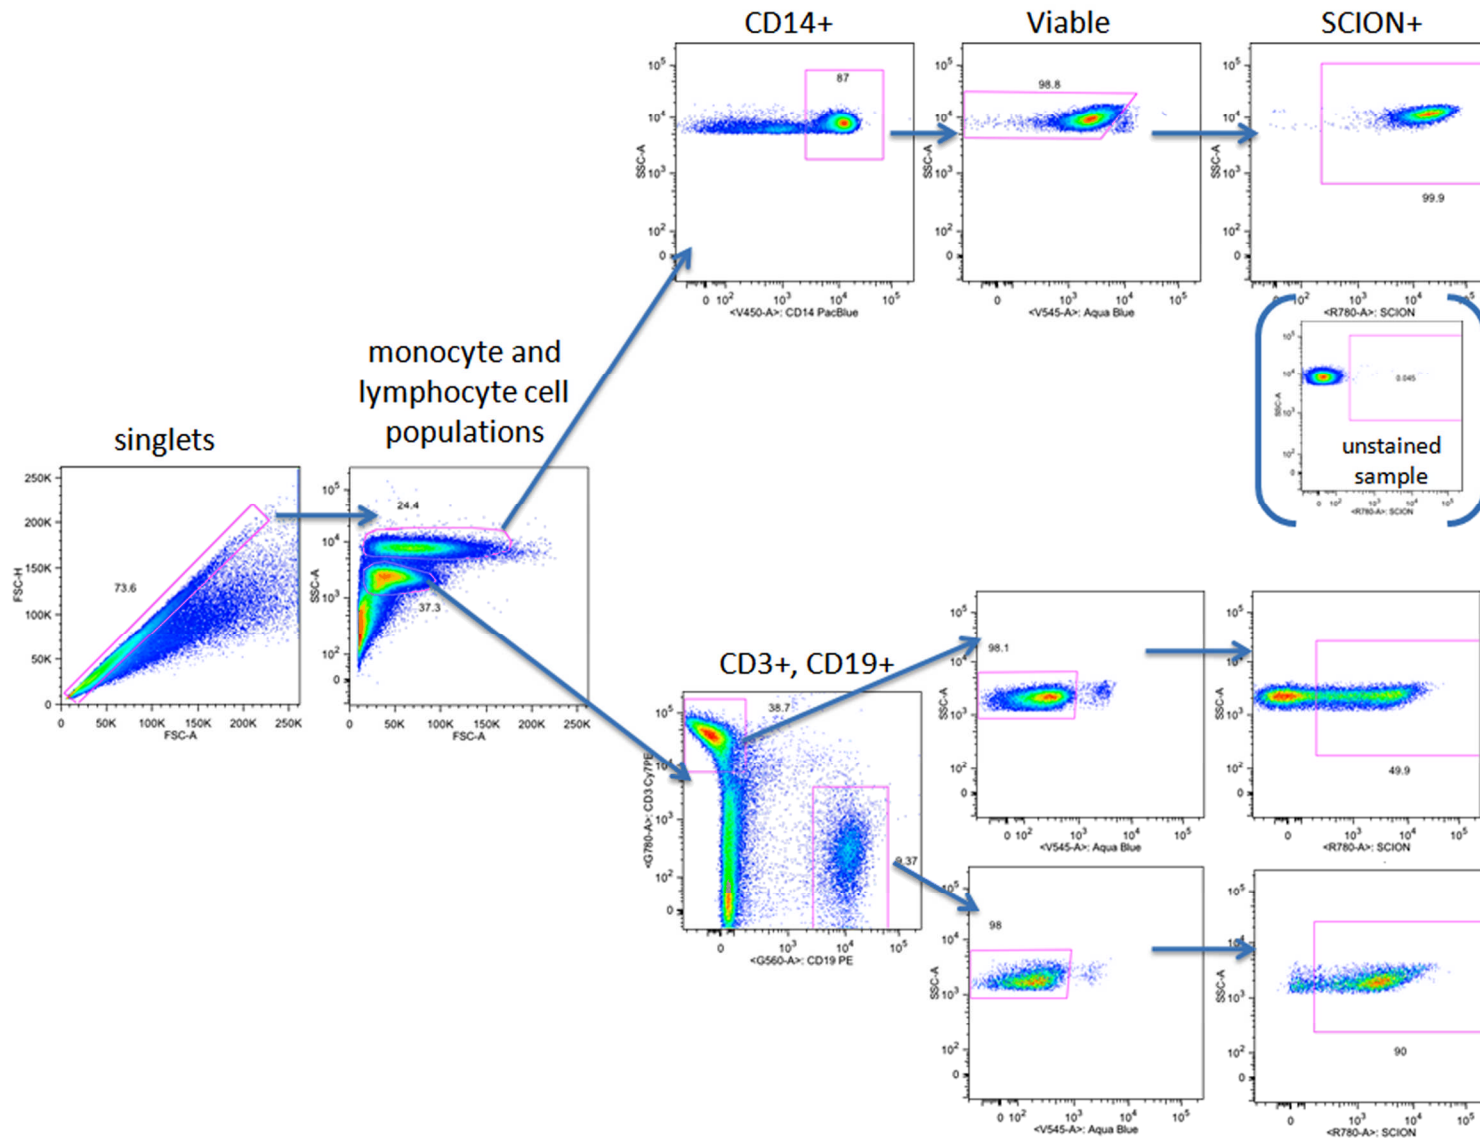

Supplemental Figure 1. Gating schema for flow cytometry analysis of cell viability.
